# Supplementary material for: Carbon fibre based flexible piezoresistive composites to empower inherent sensing capabilities for soft actuators
Source: Royal Society of Chemistry journal article supplement (doi:10.1039/c9sm01046g), 2019-01-01
Supplement: c9sm01046g1.pdf [file c9sm01046g1.pdf]

## Supplementary Materials

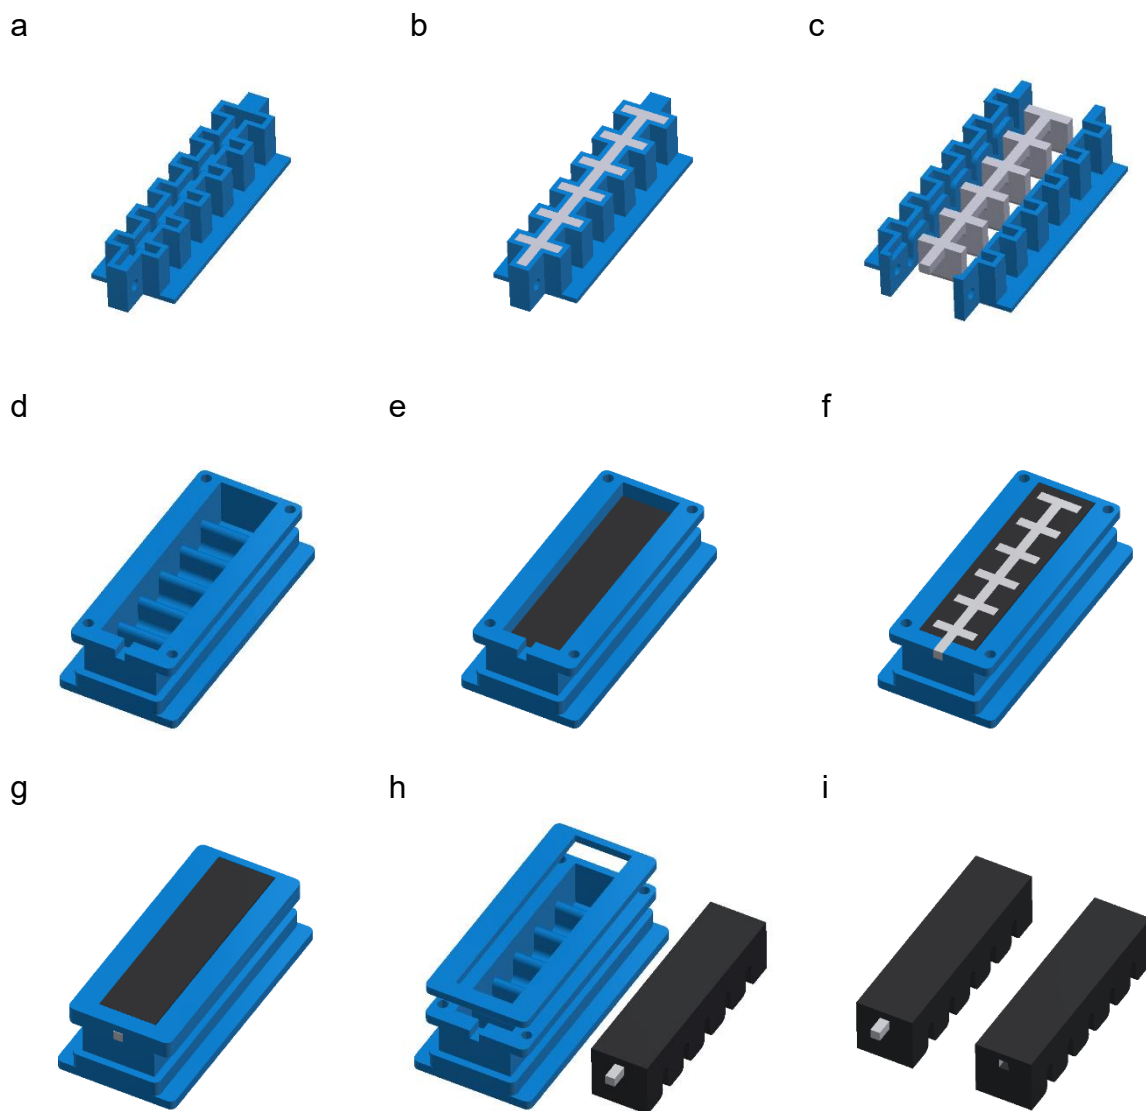

Figure S1. Process of integrated soft finger fabrication **(a)** The wax core mould. **(b)** Pouring the melted liquid wax into the mould, cooling and consolidating. **(c)** Unmoulding the wax core. **(d)** Assembly of the cavity mould. **(e)** Pouring prepared composite to the cavity mould. **(f)** Placing the wax core into the mould. **(g)** Adding the top mould on. **(h)** After curing at 45°C for 1 hour, unmoulding the integrated finger and trimming the edge. **(i)** Removing the wax core.

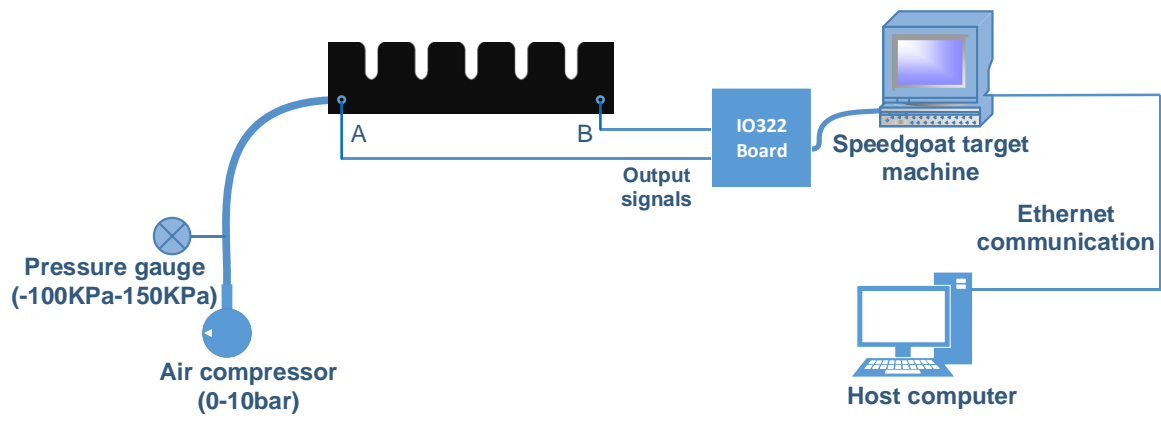

Figure S2: Experimental setting-up for the deformation tests of an integrated finger
